# Supplementary material
Source: PubMed Central journal article supplement (PMC2916083)
Supplement: NIHMS220265-supplement-1_si_001.pdf [file NIHMS220265-supplement-1_si_001.pdf]

## **Supporting Information**

### **Computational Mutation Scanning and Drug Resistance**

#### **Mechanisms of HIV-1 Protease Inhibitors**

Ge-Fei Hao,<sup>a,b</sup> Guang-Fu Yang,<sup>a,\*</sup> and Chang-Guo Zhan<sup>b,\*</sup>

<sup>a</sup>*Key Laboratory of Pesticide & Chemical Biology of Ministry of Education, College of Chemistry, Central China Normal University, Wuhan 430079, P. R. China and* <sup>b</sup>*Department of Pharmaceutical Sciences, College of Pharmacy, University of Kentucky, 725 Rose Street, Lexington, KY 40536*

#### **Correspondence:**

Chang-Guo Zhan, Ph.D.  
Professor, Department of Pharmaceutical Sciences  
College of Pharmacy  
University of Kentucky  
725 Rose Street  
Lexington, KY 40536  
TEL: 859-323-3943  
FAX: 859-323-3575  
E-mail: [zhan@uky.edu](mailto:zhan@uky.edu)

#### **Supporting Information Available**

Figure S1 for the RMSD and some key internuclear distances *versus* the simulation time for wild-type HIV-1 protease binding with inhibitors; Figure S2 for comparison between the X-ray structures of the WT and mutated HIV-1 protease; Figure S3 for the RMSD and some key internuclear distances *versus* the simulation time for SQV binding with the I54M mutant, APV binding with the V82F mutant, and IDV binding with the R8Q mutant; Tables S1 to S9 for the detailed energetic results in comparison with the corresponding experimental data. Tables S10 for the comparison between the X-ray structures of the WT and mutated HIV-1 protease in the RMSD of the backbone and ligand atoms. This material is available free of charge *via* the Internet at <http://pubs.acs.org>.

---

\* To whom correspondence should be addressed. E-mail: [gfyang@mail.ccnu.edu.cn](mailto:gfyang@mail.ccnu.edu.cn) and [zhan@uky.edu](mailto:zhan@uky.edu)

(A) SQV binding with HIV-1 protease

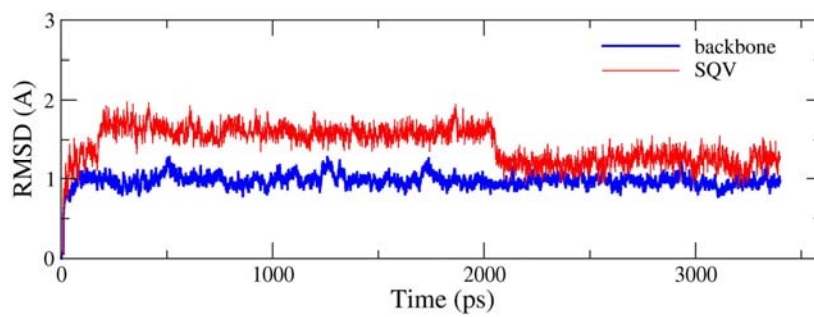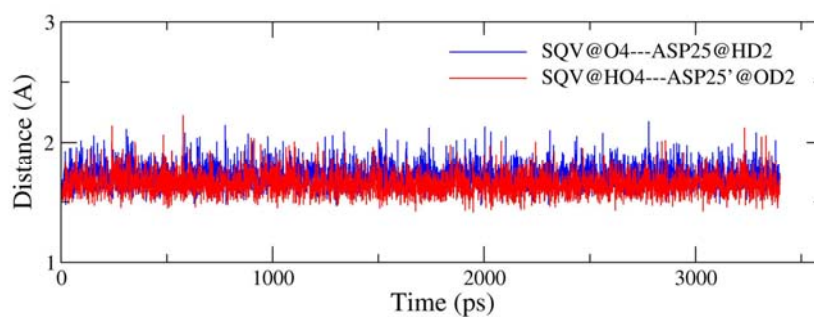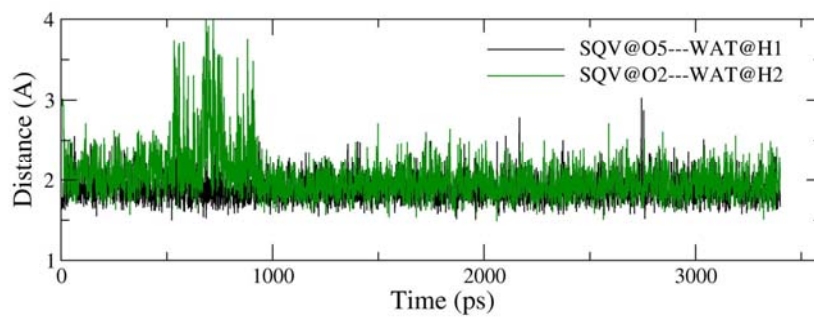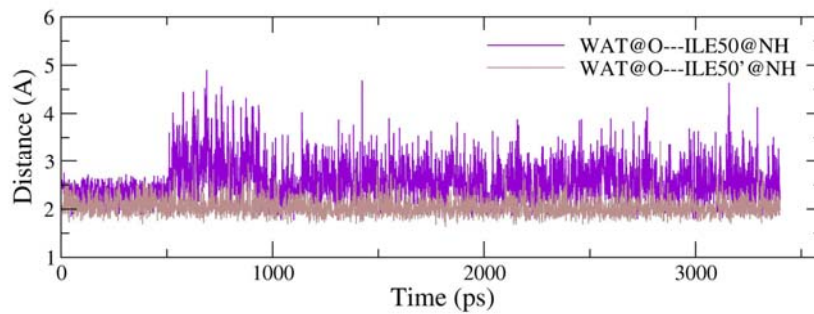

(B) APV binding with HIV-1 protease

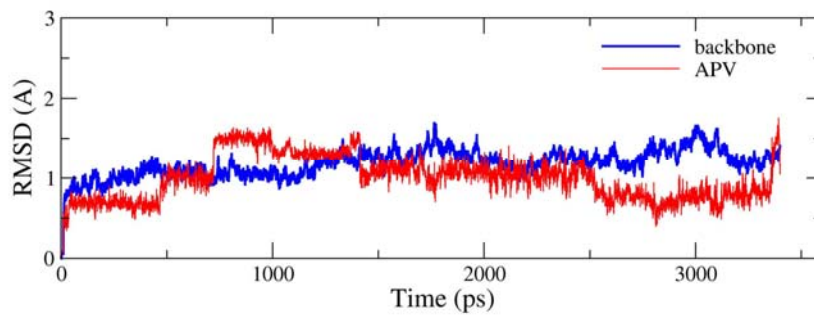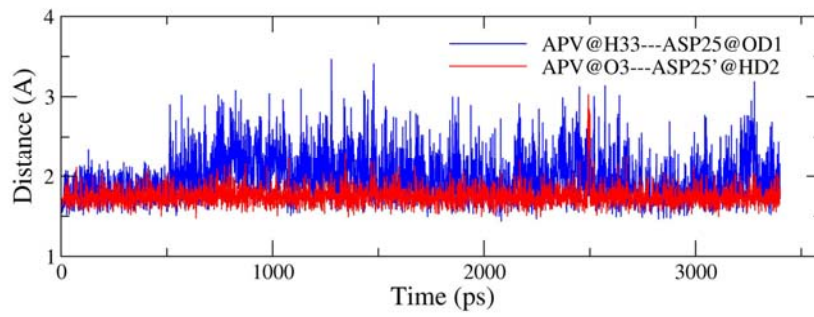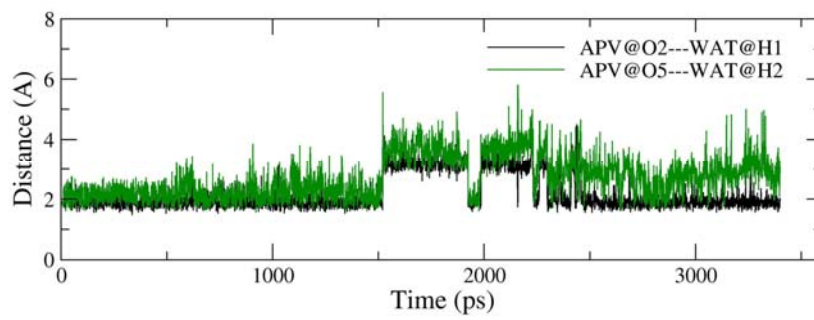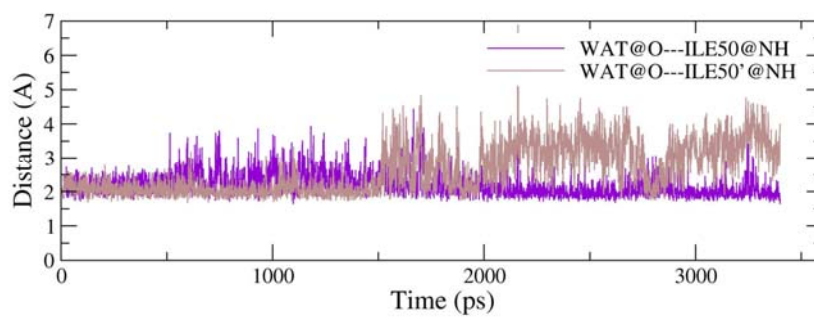

(C) IDV binding with HIV-1 protease

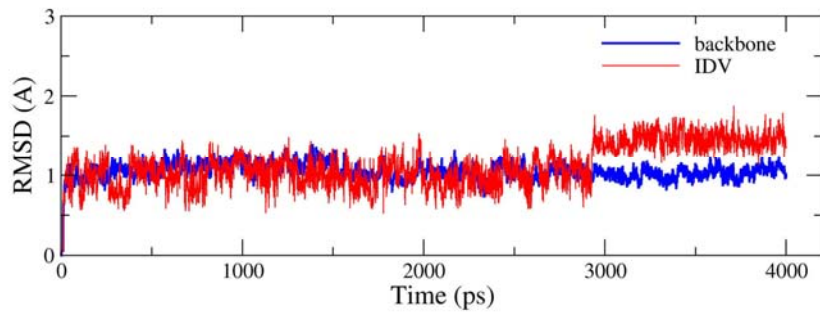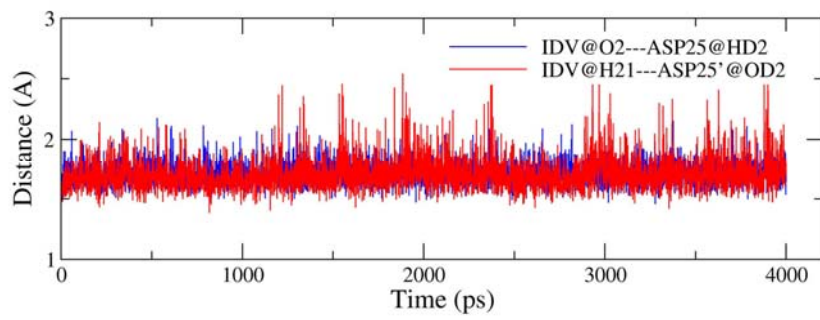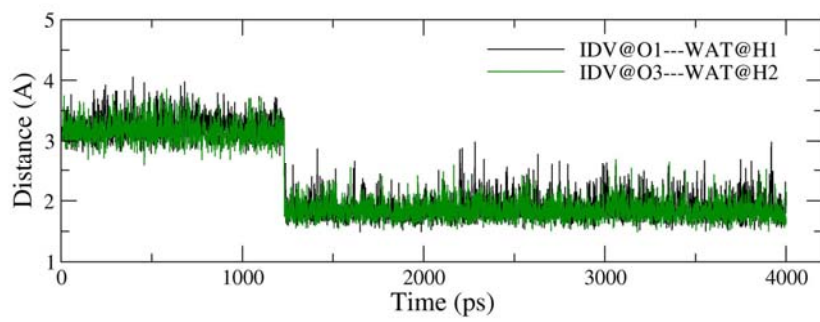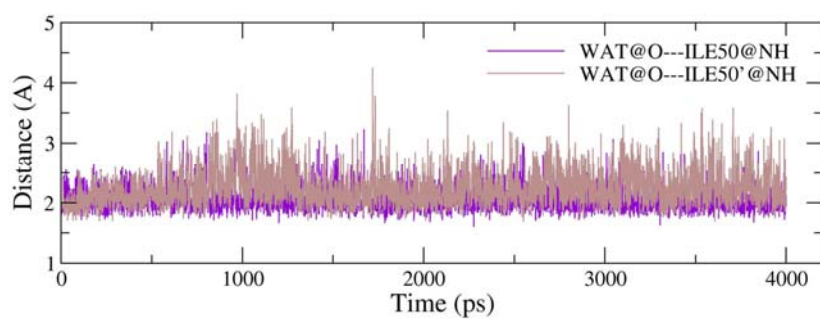

(D) NFV binding with HIV-1 protease

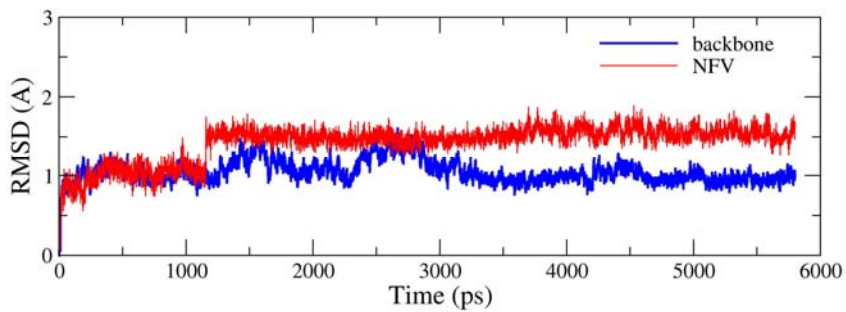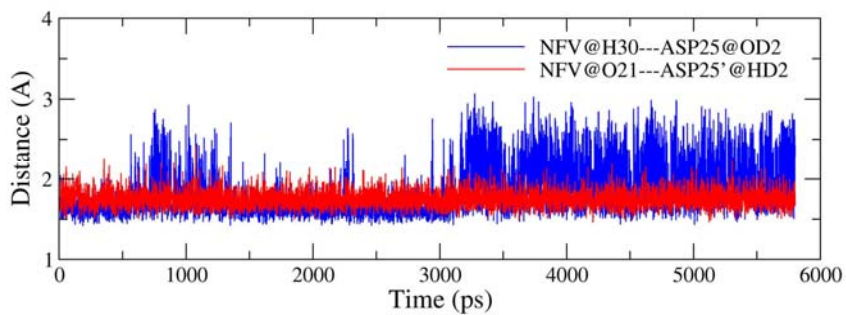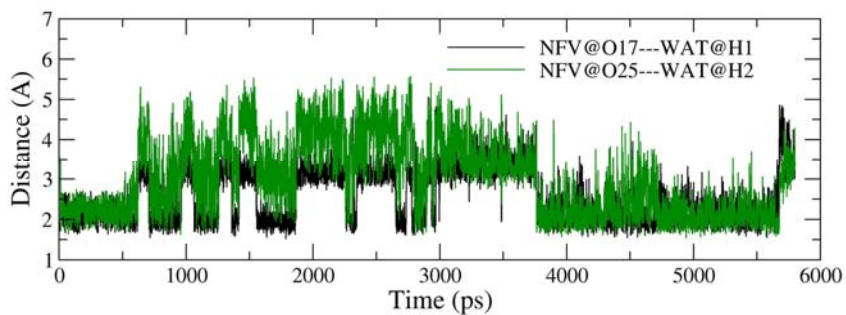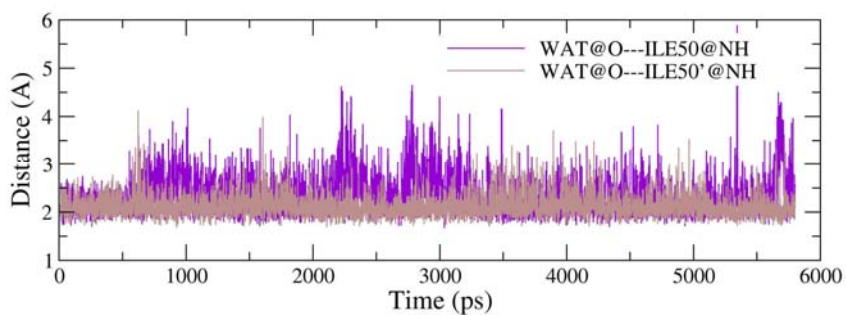

(E) RTV binding with HIV-1 protease

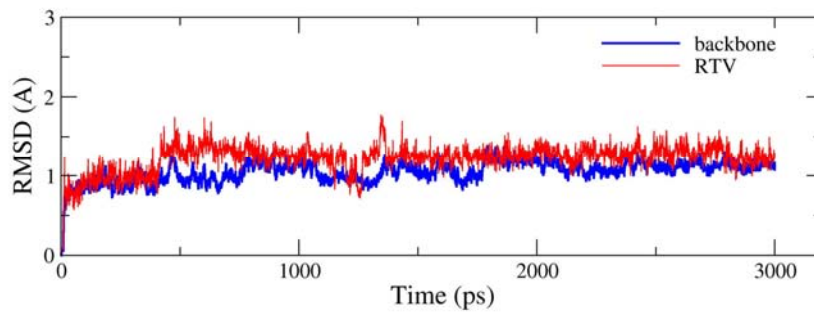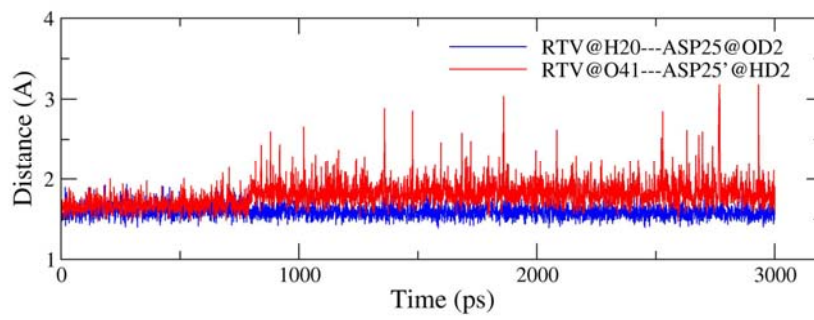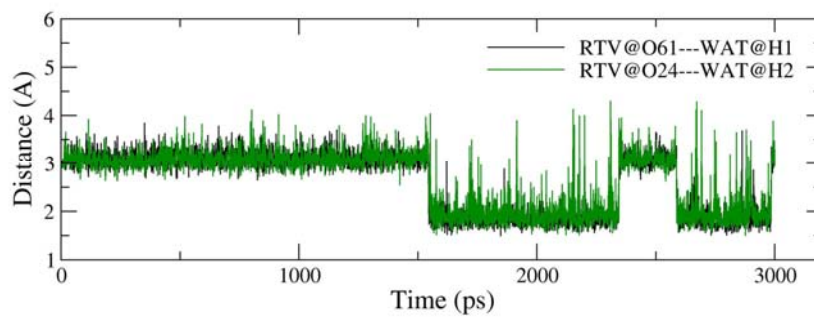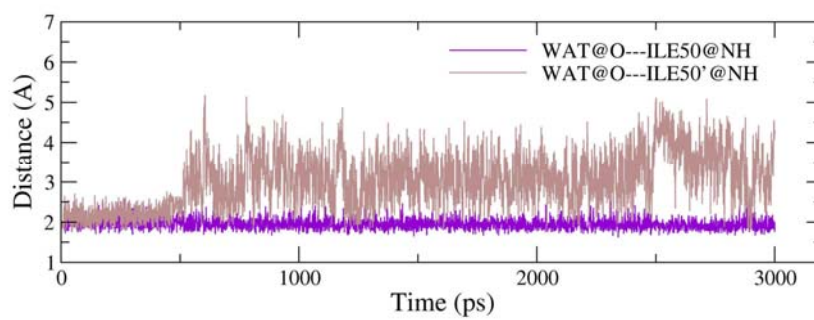



(F) LPV binding with HIV-1 protease

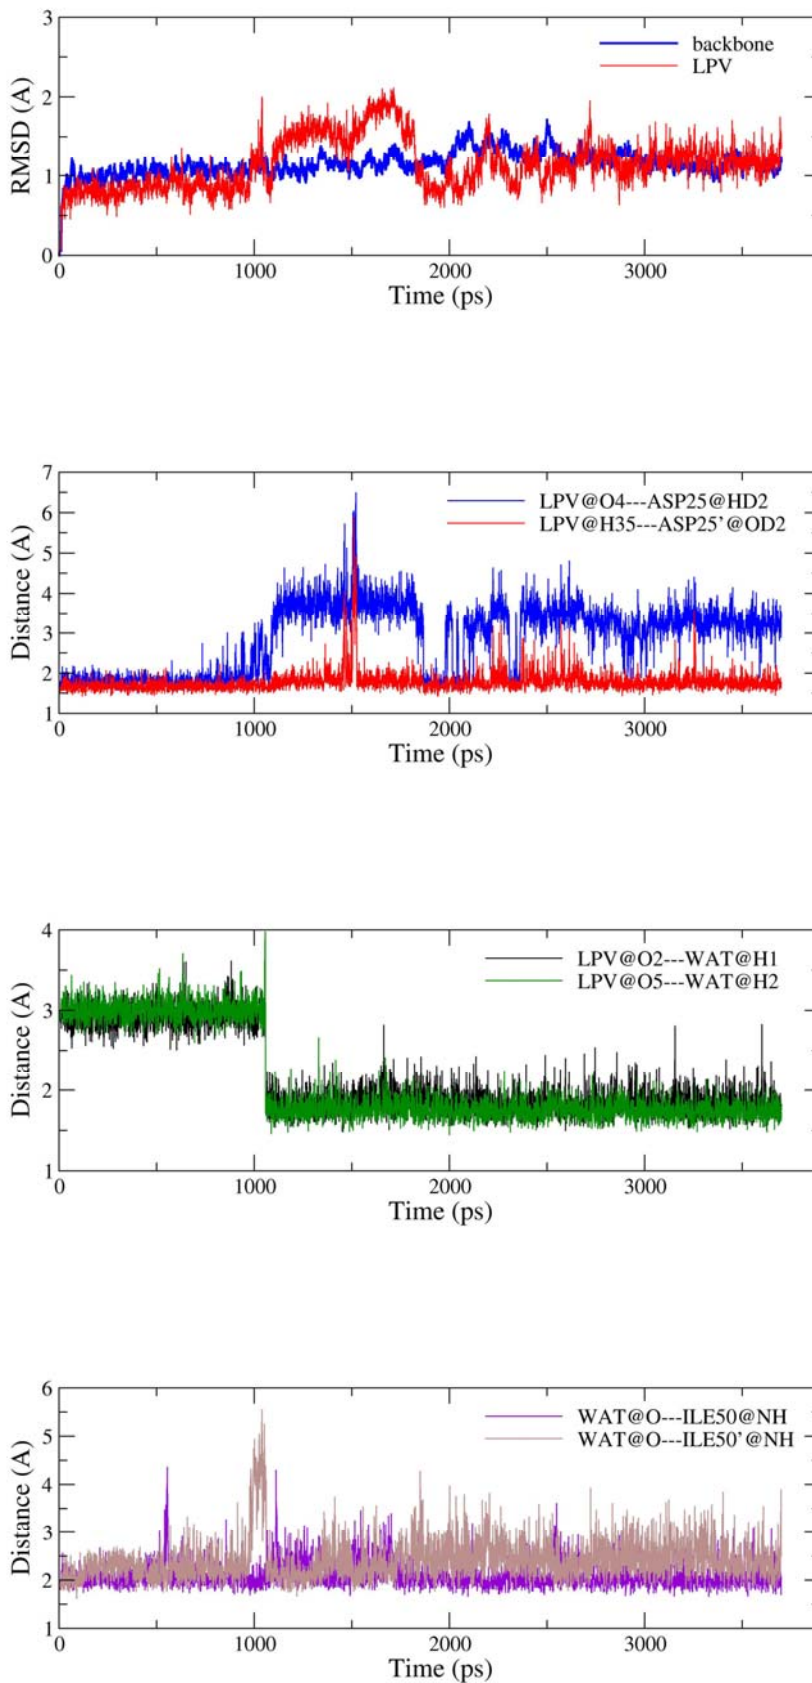

**Figure S1.** MD trajectories for HIV-1 protease binding with inhibitors: RMSD representing the root-mean-square deviation of the simulated positions of the protein backbone atoms and

inhibitor atoms from those in the initial structure; plots of the key internuclear distances vs the simulation time for the inhibitors binding with the HIV-1 protease. The distances shown in the figure are associated with the hydrogen bonds between the inhibitor and Asp25 (25'), between the inhibitor and water molecule (WAT), and between the inhibitor and Ile50 (50').

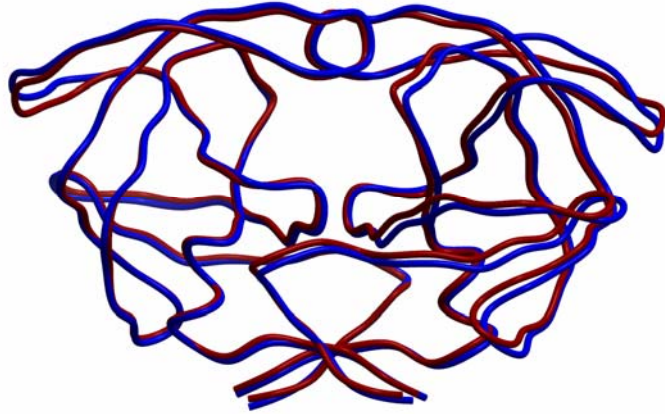

A

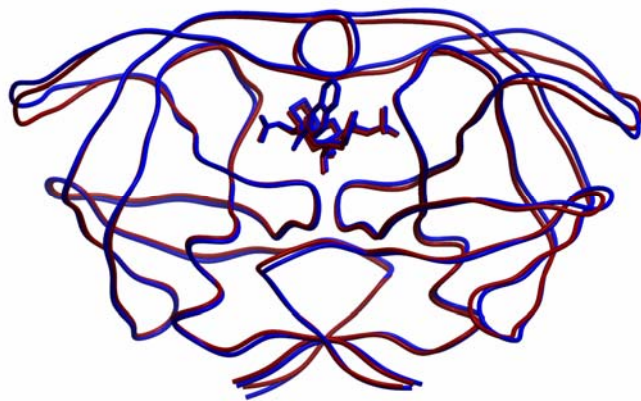

B

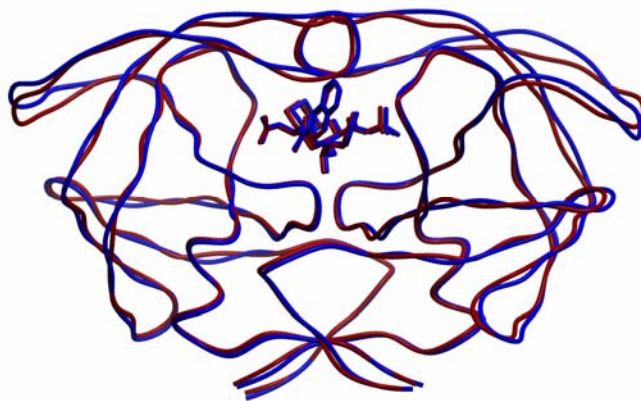

C



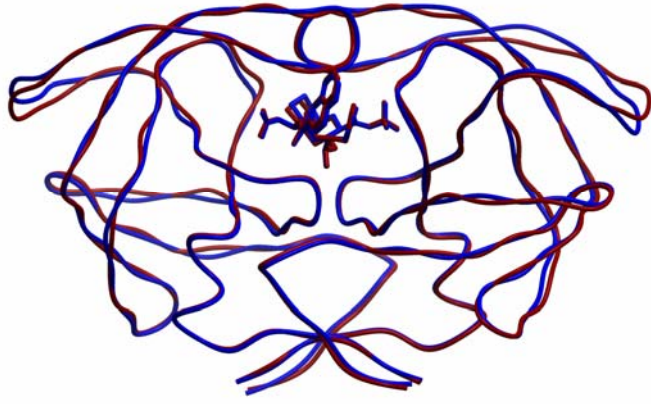

D

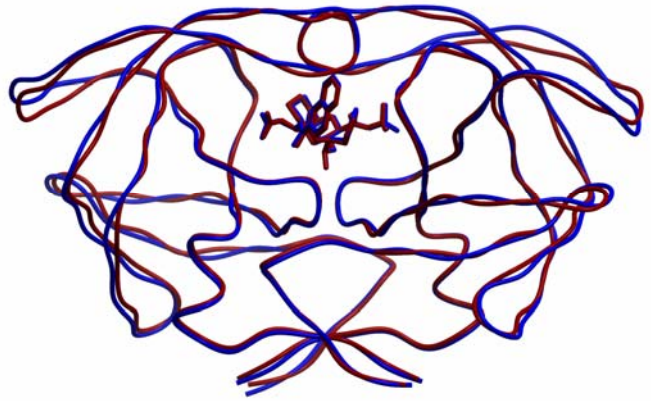

E

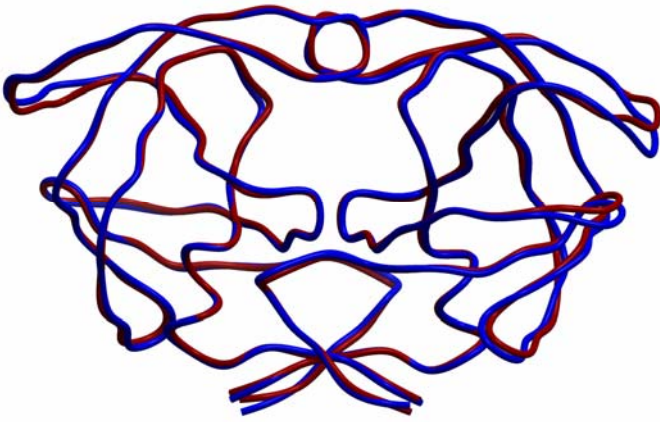

F

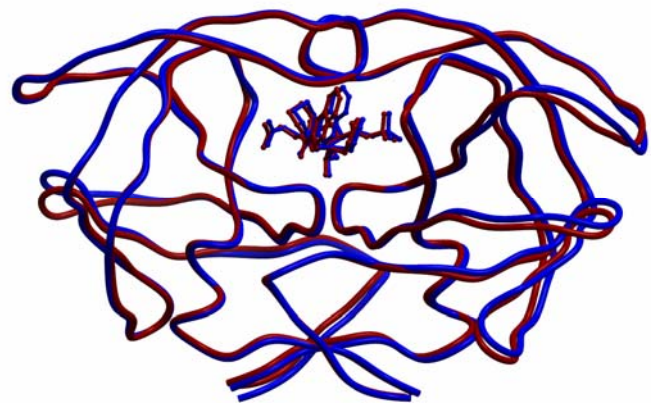

G

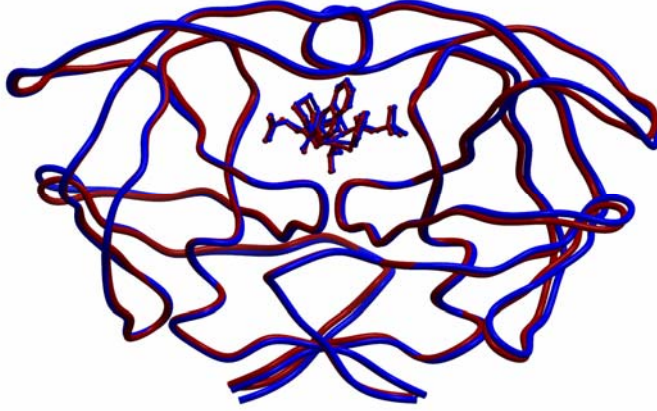

H

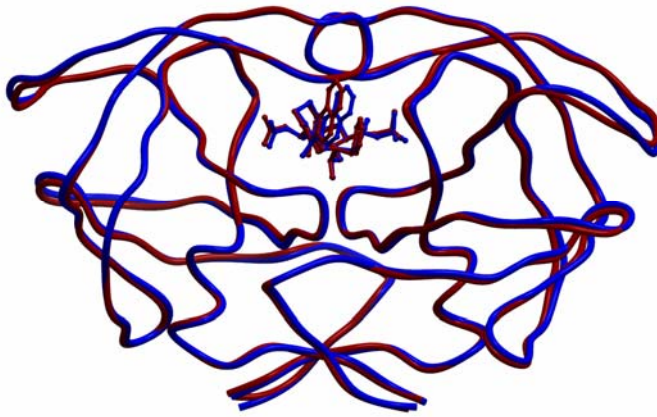

I

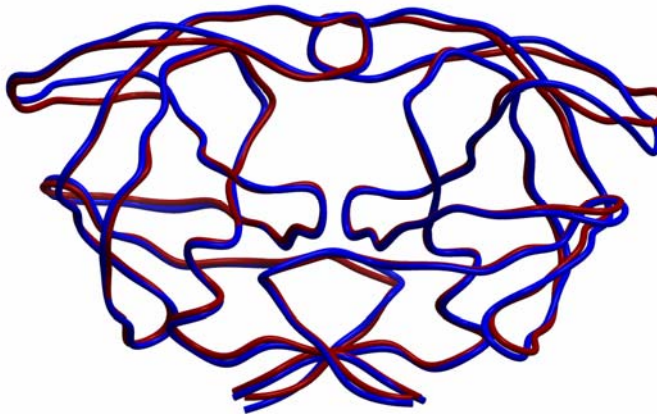

J

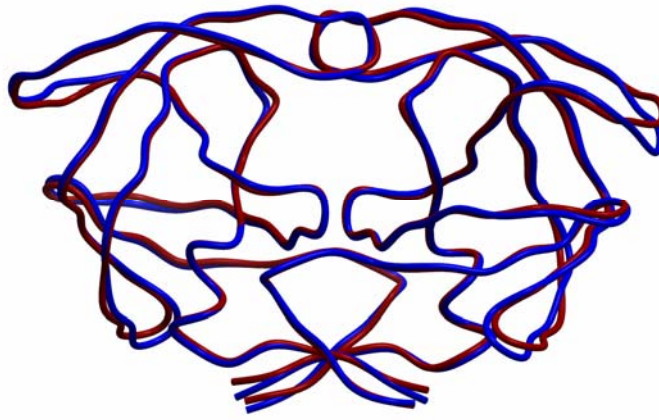

**K**

**Figure S2.** Comparison between the X-ray structures of the WT and mutated HIV-1 protease (WT in blue and mutant in red): (A) G48V mutant with the WT; (B) I50V mutant with the WT; (C) I54M mutant with the WT; (D) V82A mutant with the WT; (E) I84V mutant with the WT; (F) A71T/V82A mutant with the WT; (G) Q7K/I64V/T80N mutant with the WT; (H) Q7K/I64V/T80S mutant with the WT; (I) Q7K/D25N/L63P/V82A mutant with the WT; (J) T31D/V32I/L33V/E34A/E35G/M36I/S37E/I47V/V82I mutant with the WT; (K) L10F/I13V/G16A/K20M/V32I/K43T/M46V/I47V/I54M/I64V/A71T/V82A mutant with the WT.

(A) The I54M mutant binding with SQV

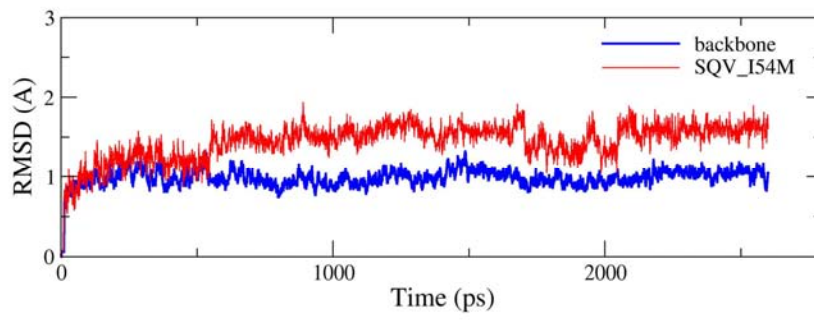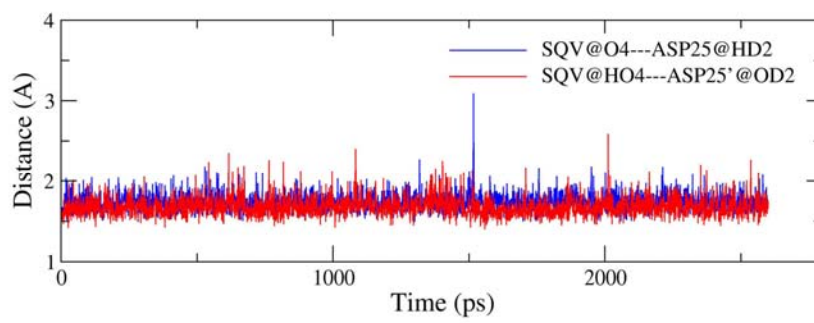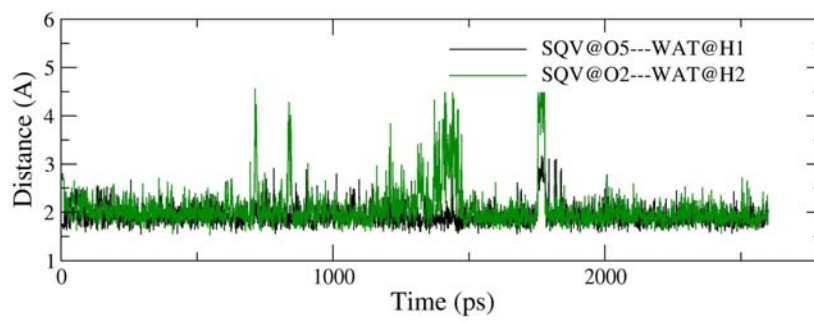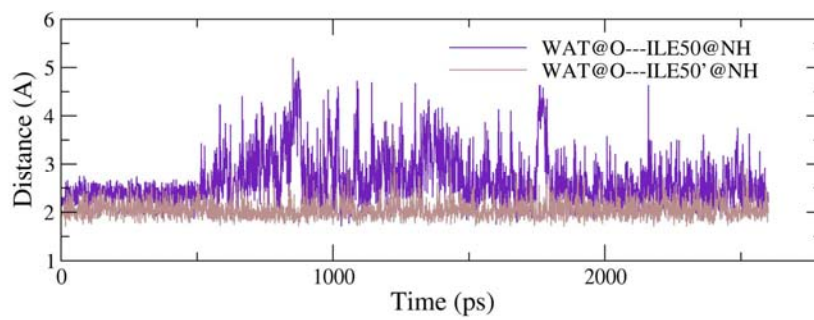



(B) V82F mutant binding with APV

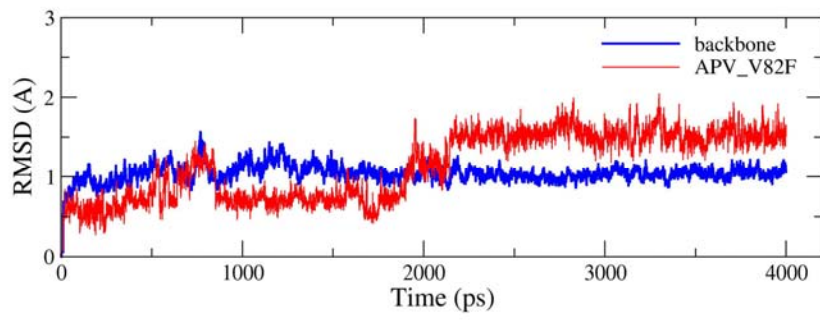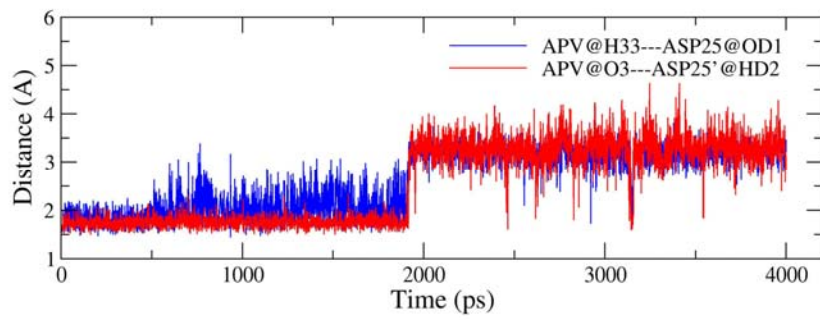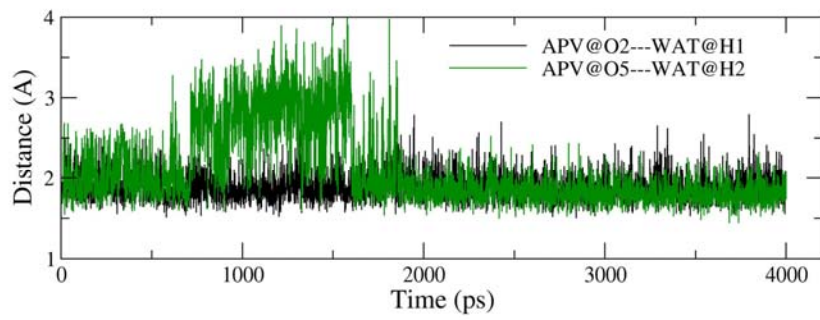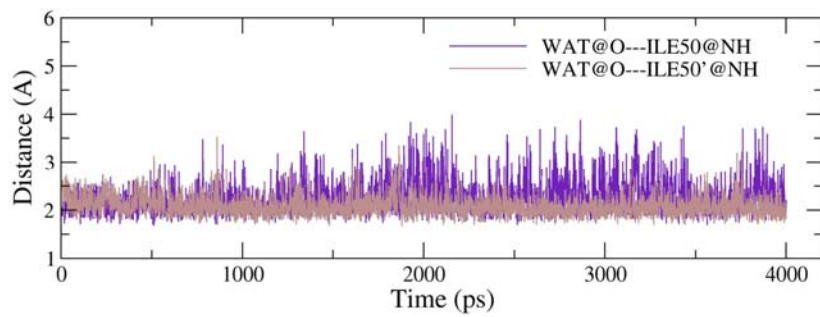



(C) The R8Q mutant binding with IDV

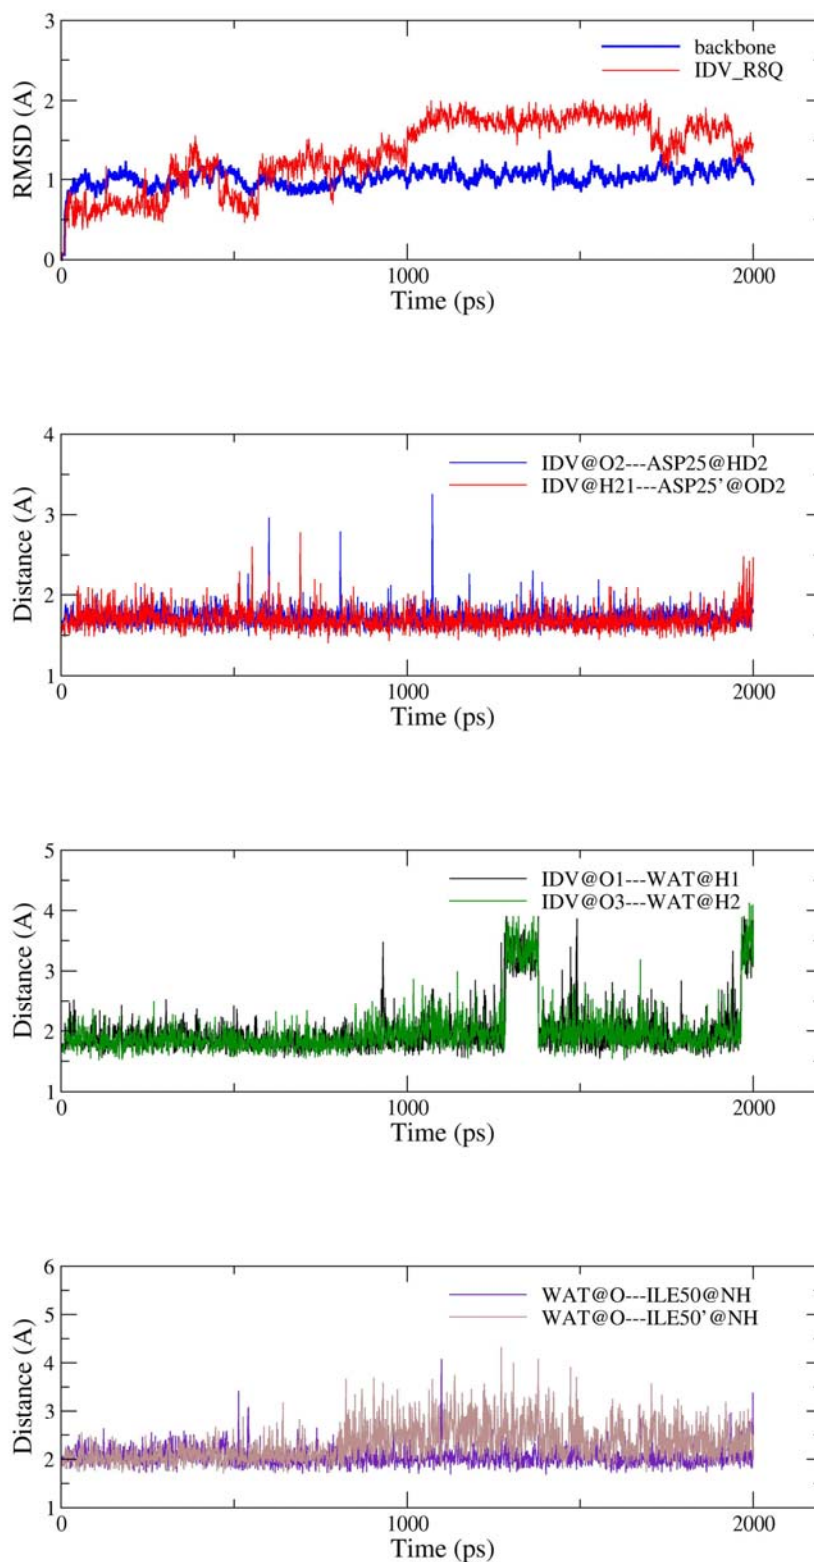

**Figure S3.** MD trajectories for the I54M mutant binding with SQV (A), the V82F mutant binding with APV (B), and the R8Q mutant binding with IDV (C): RMSD representing the root-mean-square deviation of the simulated positions of the protein backbone atoms and inhibitor atoms from those in the initial structure; plots of the key internuclear distances *vs* the

simulation time. The distances shown in the figure are associated with the hydrogen bonds between the inhibitor and Asp25 (25'), between the inhibitor and water molecule (WAT), and between the inhibitor and Ile50 (50').

**Table S1.** Binding free energies calculated for the WT HIV-1 protease with six drugs in clinical use (kcal/mol)

| Inhibitor | $\Delta E_{\text{ele}}$ | $\Delta E_{\text{vdw}}$ | $\Delta E_{\text{MM}}$ | $\Delta G_{\text{PB}}$ | $\Delta G_{\text{np}}$ | $\Delta E_{\text{bind}}$ | $-T\Delta S_{\text{conf}}$ | $-T\Delta S_{\text{solv}}$ | $-T\Delta S$ | $\Delta G_{\text{bind}}$ | $\Delta G_{\text{exp}}$ |
|-----------|-------------------------|-------------------------|------------------------|------------------------|------------------------|--------------------------|----------------------------|----------------------------|--------------|--------------------------|-------------------------|
| SQV       | -93.04                  | -70.90                  | -163.94                | 99.55                  | -6.98                  | -71.37                   | 60.98                      | -23.49                     | 37.49        | -33.88                   | -14.32 [ref. 55]        |
| RTV       | -78.37                  | -74.96                  | -153.32                | 84.19                  | -6.98                  | -76.11                   | 61.44                      | -25.56                     | 35.88        | -40.23                   | -14.92 [ref. 55]        |
| IDV       | -85.75                  | -74.89                  | -160.65                | 102.04                 | -6.97                  | -65.58                   | 64.37                      | -25.04                     | 39.33        | -26.26                   | -13.14 [ref. 55]        |
| NFV       | -59.69                  | -71.17                  | -130.86                | 84.82                  | -6.30                  | -52.34                   | 57.74                      | -23.70                     | 34.04        | -18.30                   | -12.24 [ref. 56]        |
| APV       | -74.29                  | -62.85                  | -137.15                | 86.00                  | -5.68                  | -56.83                   | 54.86                      | -20.58                     | 34.28        | -22.55                   | -12.60 [ref. 56]        |
| LPV       | -63.82                  | -66.34                  | -130.16                | 78.19                  | -6.56                  | -58.53                   | 56.22                      | -24.17                     | 32.05        | -26.48                   | -14.30 [ref. 57]        |

**Table S2.** Experimental and calculated binding free energy changes (kcal/mol) of SQV in complex with the wild-type and mutant HIV-1 protease

| SQV       | RL                | $\Delta\Delta E_{\text{ele}}$ | $\Delta\Delta E_{\text{vdw}}$ | $\Delta\Delta E_{\text{MM}}$ | $\Delta\Delta G_{\text{pb}}$ | $\Delta\Delta G_{\text{np}}$ | $\Delta\Delta E_{\text{cal}}$ | $-T\Delta\Delta S_{\text{conf}}$ | $-T\Delta\Delta S_{\text{solv}}$ | $-T\Delta\Delta S$ | $\Delta\Delta G_{\text{cal}}$ | $\Delta\Delta G_{\text{exp}}$ |
|-----------|-------------------|-------------------------------|-------------------------------|------------------------------|------------------------------|------------------------------|-------------------------------|----------------------------------|----------------------------------|--------------------|-------------------------------|-------------------------------|
| WT        | 1.00              | 0.00                          | 0.00                          | 0.00                         | 0.00                         | 0.00                         | 0.00                          | 0.00                             | 0.00                             | 0.00               | 0.00                          | 0.00                          |
| A71T/V82A | 1.53 [ref. 68]    | 0.05                          | 1.97                          | 2.03                         | -0.28                        | -0.03                        | 1.72                          | -1.92                            | 0.57                             | -1.35              | 0.37                          | 0.25                          |
| G48V      | 160.00 [ref. 55]  | -0.92                         | 7.43                          | 6.52                         | -0.28                        | 0.02                         | 6.26                          | 1.05                             | -0.22                            | 0.83               | 7.09                          | 3.01                          |
| G48V/L90M | 1767.50 [ref. 59] | -1.00                         | 7.55                          | 6.54                         | -0.24                        | 0.03                         | 6.34                          | 0.99                             | -0.15                            | 0.84               | 7.18                          | 4.44                          |
| I47V      | 0.50 [ref. 56]    | 0.08                          | 0.49                          | 0.57                         | -0.24                        | -0.01                        | 0.31                          | -2.00                            | 0.07                             | -1.93              | -1.62                         | -0.41                         |
| I50V      | 24.00 [ref. 57]   | -0.25                         | 1.76                          | 1.52                         | 2.00                         | -0.07                        | 3.45                          | -2.09                            | 0.82                             | -1.27              | 2.18                          | 1.89                          |
| I54M      | 5.00 [ref. 57]    | -0.09                         | -0.05                         | -0.14                        | 0.16                         | 0.09                         | 0.01                          | 0.30                             | 0.00                             | 0.30               | 0.31                          | 0.95                          |
| I54V      | 15.00 [ref. 57]   | -0.05                         | 0.09                          | 0.04                         | 0.12                         | 0.00                         | 0.16                          | -0.07                            | 0.02                             | -0.05              | 0.11                          | 1.61                          |
| I84V      | 17.00 [ref. 60]   | 0.05                          | 2.85                          | 2.90                         | 1.26                         | -0.12                        | 4.04                          | -2.09                            | 0.69                             | -1.40              | 2.64                          | 1.68                          |
| L10F      | 1.75 [ref. 70]    | -0.10                         | -0.02                         | -0.12                        | 0.09                         | -0.02                        | -0.06                         | 0.10                             | 0.01                             | 0.11               | 0.05                          | 0.33                          |
| L10F/I50V | 33.70 [ref. 56]   | -0.40                         | 1.72                          | 1.31                         | 1.99                         | -0.07                        | 3.24                          | -2.00                            | 0.84                             | -1.16              | 2.08                          | 2.09                          |
| L10F/I84V | 21.00 [ref. 70]   | -0.08                         | 2.75                          | 2.66                         | 1.05                         | -0.10                        | 3.62                          | -2.05                            | 0.68                             | -1.37              | 2.25                          | 1.81                          |
| L90M      | 2.70 [ref. 60]    | -0.24                         | 0.06                          | -0.17                        | 0.08                         | -0.01                        | -0.10                         | -0.03                            | 0.05                             | 0.02               | -0.08                         | 0.59                          |
| M46I      | 1.00 [ref. 70]    | -0.03                         | -0.01                         | -0.05                        | 0.14                         | -0.01                        | 0.08                          | 0.14                             | -0.07                            | 0.07               | 0.15                          | 0.00                          |
| M46I/I84V | 4.50 [ref. 69]    | -0.02                         | 2.83                          | 2.81                         | 1.20                         | -0.11                        | 3.89                          | -2.01                            | 0.62                             | -1.39              | 2.50                          | 0.89                          |
| V32I      | 1.60 [ref. 69]    | -0.22                         | 0.43                          | 0.22                         | -0.44                        | 0.02                         | -0.21                         | 1.26                             | -0.31                            | 0.95               | 0.74                          | 0.28                          |
| V32I/I84V | 14.20 [ref. 69]   | -0.16                         | 3.16                          | 3.00                         | 0.57                         | -0.08                        | 3.49                          | -0.90                            | 0.39                             | -0.51              | 2.98                          | 1.57                          |

|      |                |      |       |      |       |       |       |       |       |       |      |      |
|------|----------------|------|-------|------|-------|-------|-------|-------|-------|-------|------|------|
| V82A | 1.67 [ref. 62] | 0.13 | 1.96  | 2.10 | -0.14 | -0.05 | 1.90  | -2.02 | 0.60  | -1.42 | 0.48 | 0.30 |
| V82I | 7.30 [ref. 62] | 0.19 | -0.01 | 0.19 | -0.59 | -0.01 | -0.41 | 1.94  | -0.08 | 1.86  | 1.45 | 1.18 |

**Table S3.** Comparison between the CMS and MD results.

|     |     |      | RL        | $\Delta E_{\text{ele}}$ | $\Delta E_{\text{vdw}}$ | $\Delta E_{\text{MM}}$ | $\Delta G_{\text{PB}}$ | $\Delta G_{\text{NP}}$ | $\Delta E_{\text{bind}}$ | $-T\Delta S_{\text{conf}}$ | $-T\Delta S_{\text{solv}}$ | $-T\Delta S$ | $\Delta G_{\text{bind}}$ |
|-----|-----|------|-----------|-------------------------|-------------------------|------------------------|------------------------|------------------------|--------------------------|----------------------------|----------------------------|--------------|--------------------------|
| SQV | CMS | I54M | 5         | -93.13                  | -70.95                  | -164.08                | 99.71                  | -6.98                  | -71.36                   | 61.28                      | -23.49                     | 37.79        | -33.57                   |
|     | MD  |      | [ref. 67] | -100.88                 | -70.72                  | -171.6                 | 106.22                 | -7.06                  | -72.45                   | 61.46                      | -23.27                     | 38.19        | -34.26                   |

**Table S4.** Experimental and calculated binding free energy changes (kcal/mol) of RTV in complex with the wild-type and mutant HIV-1 protease

| RTV       | RL               | $\Delta\Delta E_{\text{ele}}$ | $\Delta\Delta E_{\text{vdw}}$ | $\Delta\Delta E_{\text{MM}}$ | $\Delta\Delta G_{\text{pb}}$ | $\Delta\Delta G_{\text{np}}$ | $\Delta\Delta E_{\text{cal}}$ | $-T\Delta\Delta S_{\text{conf}}$ | $-T\Delta\Delta S_{\text{solv}}$ | $-T\Delta\Delta S$ | $\Delta\Delta G_{\text{cal}}$ | $\Delta\Delta G_{\text{exp}}$ |
|-----------|------------------|-------------------------------|-------------------------------|------------------------------|------------------------------|------------------------------|-------------------------------|----------------------------------|----------------------------------|--------------------|-------------------------------|-------------------------------|
| WT        | 1.00             | 0.00                          | 0.00                          | 0.00                         | 0.00                         | 0.00                         | 0.00                          | 0.00                             | 0.00                             | 0.00               | 0.00                          | 0.00                          |
| G48V      | 70.00 [ref. 55]  | 2.82                          | -0.68                         | 2.13                         | -0.25                        | -0.09                        | 1.79                          | 1.92                             | -0.57                            | 1.35               | 3.14                          | 2.52                          |
| G48V/L90M | 90.00 [ref. 55]  | 2.81                          | -0.68                         | 2.12                         | -0.25                        | -0.09                        | 1.79                          | 1.97                             | -0.49                            | 1.48               | 3.27                          | 2.67                          |
| I84V      | 33.70 [ref. 64]  | 0.27                          | 3.07                          | 3.33                         | 0.66                         | -0.13                        | 3.86                          | -2.08                            | 0.43                             | -1.65              | 2.21                          | 2.09                          |
| L90M      | 5.00 [ref. 60]   | -0.13                         | 0.06                          | -0.07                        | -0.02                        | 0.01                         | -0.09                         | -0.05                            | 0.08                             | 0.03               | -0.06                         | 0.95                          |
| M46I      | 1.90 [ref. 69]   | -0.06                         | 0.01                          | -0.06                        | 0.01                         | -0.01                        | -0.06                         | -0.05                            | -0.04                            | -0.09              | -0.15                         | 0.38                          |
| M46I/I84V | 9.40 [ref. 69]   | 0.21                          | 3.05                          | 3.25                         | 0.62                         | -0.13                        | 3.74                          | -2.09                            | 0.39                             | -1.70              | 2.04                          | 1.33                          |
| R8Q       | 23.10 [ref. 69]  | -0.39                         | 2.92                          | 2.52                         | 0.65                         | 0.15                         | 3.33                          | -1.11                            | 0.53                             | -0.58              | 2.75                          | 1.86                          |
| V32I      | 3.40 [ref. 69]   | 0.06                          | 0.65                          | 0.69                         | -1.01                        | 0.03                         | -0.28                         | 1.57                             | 0.25                             | 1.82               | 1.54                          | 0.73                          |
| V32I/I84V | 63.50 [ref. 69]  | 0.28                          | 3.69                          | 3.95                         | -0.15                        | -0.08                        | 3.72                          | -0.50                            | 0.66                             | 0.16               | 3.88                          | 2.46                          |
| V82A      | 11.20 [ref. 62]  | -0.11                         | 2.92                          | 2.80                         | 0.03                         | 0.02                         | 2.85                          | -1.56                            | 1.07                             | -0.49              | 2.36                          | 1.43                          |
| V82F      | 90.00 [ref. 60]  | -0.76                         | 1.77                          | 1.00                         | 0.91                         | -0.08                        | 1.83                          | 1.44                             | -0.08                            | 1.36               | 3.19                          | 2.67                          |
| V82F/I84V | 700.00 [ref. 62] | -0.46                         | 4.74                          | 4.27                         | 1.65                         | -0.20                        | 5.71                          | -0.64                            | 0.43                             | -0.21              | 5.50                          | 3.89                          |
| V82I      | 14.70 [ref. 62]  | -0.15                         | 0.75                          | 0.59                         | 0.18                         | 0.00                         | 0.77                          | 2.04                             | -0.14                            | 1.90               | 2.67                          | 1.59                          |

**Table S5.** Experimental and calculated binding free energy changes (kcal/mol) of IDV in complex with the wild-type and mutant HIV-1 protease

| IDV | RL   | $\Delta\Delta E_{\text{ele}}$ | $\Delta\Delta E_{\text{vdw}}$ | $\Delta\Delta E_{\text{MM}}$ | $\Delta\Delta G_{\text{pb}}$ | $\Delta\Delta G_{\text{np}}$ | $\Delta\Delta E_{\text{cal}}$ | $-T\Delta\Delta S_{\text{conf}}$ | $-T\Delta\Delta S_{\text{solv}}$ | $-T\Delta\Delta S$ | $\Delta\Delta G_{\text{cal}}$ | $\Delta\Delta G_{\text{exp}}$ |
|-----|------|-------------------------------|-------------------------------|------------------------------|------------------------------|------------------------------|-------------------------------|----------------------------------|----------------------------------|--------------------|-------------------------------|-------------------------------|
| WT  | 1.00 | 0.00                          | 0.00                          | 0.00                         | 0.00                         | 0.00                         | 0.00                          | 0.00                             | 0.00                             | 0.00               | 0.00                          | 0.00                          |

|           |                  |       |       |       |       |       |       |       |       |       |       |      |
|-----------|------------------|-------|-------|-------|-------|-------|-------|-------|-------|-------|-------|------|
| A71T/V82A | 3.50 [ref. 68]   | -0.51 | 1.98  | 1.48  | 0.37  | -0.03 | 1.82  | -1.48 | 0.22  | -1.26 | 0.56  | 0.74 |
| G48V      | 5.00 [ref. 60]   | 0.30  | 0.52  | 0.83  | -1.53 | -0.05 | -0.75 | 2.01  | -0.74 | 1.27  | 0.52  | 0.95 |
| G48V/L90M | 7.37 [ref. 68]   | 0.52  | 0.47  | 1.00  | -1.74 | -0.03 | -0.77 | 2.04  | -0.70 | 1.34  | 0.57  | 1.18 |
| I47V      | 3.00 [ref. 70]   | -0.46 | 1.24  | 0.79  | 0.28  | -0.02 | 1.05  | -2.06 | 0.19  | -1.87 | -0.82 | 0.65 |
| I50V      | 10.00 [ref. 70]  | -3.64 | 3.15  | -0.48 | 3.33  | -0.03 | 2.82  | -1.93 | 0.24  | -1.69 | 1.13  | 1.37 |
| I84V      | 8.10 [ref. 64]   | -0.34 | 2.28  | 1.94  | 1.29  | -0.09 | 3.14  | -1.98 | -0.04 | -2.02 | 1.12  | 1.24 |
| L10F      | 4.00 [ref. 70]   | 0.13  | -0.20 | -0.06 | 0.14  | 0.00  | 0.09  | -0.04 | -0.05 | -0.09 | 0.00  | 0.82 |
| L10F/I84V | 24.00 [ref. 70]  | -0.42 | 2.16  | 1.74  | 1.40  | -0.10 | 3.04  | -1.91 | -0.07 | -1.98 | 1.06  | 1.89 |
| L90M      | 1.40 [ref. 60]   | 0.23  | -0.08 | 0.16  | -0.51 | -0.01 | -0.36 | 0.06  | 0.01  | 0.07  | -0.29 | 0.20 |
| M46I      | 4.00 [ref. 70]   | 0.05  | -0.05 | 0.01  | -0.15 | 0.00  | -0.14 | 0.01  | -0.08 | -0.07 | -0.21 | 0.82 |
| M46I/I84V | 21.50 [ref. 69]  | -0.46 | 2.25  | 1.81  | 1.21  | -0.10 | 2.92  | -2.00 | -0.14 | -2.14 | 0.78  | 1.82 |
| R8Q       | 8.20 [ref. 69]   | 5.66  | 1.97  | 7.64  | -2.12 | 0.21  | 5.73  | -2.79 | 0.97  | -1.82 | 3.91  | 1.25 |
| V32I      | 8.00 [ref. 69]   | -0.14 | 0.59  | 0.46  | -0.40 | 0.02  | 0.08  | 1.76  | 0.10  | 1.86  | 1.94  | 1.23 |
| V32I/I84V | 80.30 [ref. 69]  | -0.54 | 2.85  | 2.32  | 1.12  | -0.08 | 3.36  | -0.25 | 0.01  | -0.24 | 3.12  | 2.60 |
| V82A      | 2.70 [ref. 68]   | -0.57 | 1.93  | 1.36  | 0.76  | -0.05 | 2.07  | -1.50 | 0.17  | -1.33 | 0.74  | 0.59 |
| V82F      | 84.70 [ref. 69]  | 0.81  | 1.73  | 2.54  | -0.47 | 0.02  | 2.09  | 1.27  | -0.24 | 1.03  | 3.12  | 2.63 |
| V82F/I84V | 128.00 [ref. 57] | 0.20  | 3.61  | 3.83  | 0.99  | -0.06 | 4.76  | -0.61 | -0.07 | -0.68 | 4.08  | 2.88 |
| V82I      | 6.90 [ref. 69]   | -0.61 | -0.39 | -0.99 | 0.83  | 0.00  | -0.16 | 2.35  | -0.17 | 2.18  | 2.02  | 1.15 |

**Table S6.** Experimental and calculated binding free energy changes (kcal/mol) of NFV in complex with the wild-type and mutant HIV-1 protease

| NFV       | RL              | $\Delta\Delta E_{\text{ele}}$ | $\Delta\Delta E_{\text{vdw}}$ | $\Delta\Delta E_{\text{MM}}$ | $\Delta\Delta G_{\text{pb}}$ | $\Delta\Delta G_{\text{np}}$ | $\Delta\Delta E_{\text{cal}}$ | $-T\Delta\Delta S_{\text{conf}}$ | $-T\Delta\Delta S_{\text{solv}}$ | $-T\Delta\Delta S$ | $\Delta\Delta G_{\text{cal}}$ | $\Delta\Delta G_{\text{exp}}$ |
|-----------|-----------------|-------------------------------|-------------------------------|------------------------------|------------------------------|------------------------------|-------------------------------|----------------------------------|----------------------------------|--------------------|-------------------------------|-------------------------------|
| WT        | 1.00            | 0.00                          | 0.00                          | 0.00                         | 0.00                         | 0.00                         | 0.00                          | 0.00                             | 0.00                             | 0.00               | 0.00                          | 0.00                          |
| G48V      | 3.00 [ref. 60]  | -0.11                         | -0.51                         | -0.62                        | 0.49                         | -0.03                        | -0.16                         | 2.00                             | -0.21                            | 1.79               | 1.63                          | 0.65                          |
| G48V/L90M | 4.00 [ref. 55]  | -0.03                         | -0.48                         | -0.51                        | 0.41                         | -0.03                        | -0.13                         | 1.97                             | -0.17                            | 1.80               | 1.67                          | 0.82                          |
| I84V      | 7.50 [ref. 64]  | -0.47                         | 2.28                          | 1.81                         | 1.75                         | -0.12                        | 3.44                          | -1.99                            | 0.41                             | -1.58              | 1.86                          | 1.20                          |
| L90M      | 2.00 [ref. 55]  | 0.15                          | 0.04                          | 0.19                         | -0.18                        | 0.01                         | 0.02                          | -0.08                            | 0.03                             | -0.05              | -0.03                         | 0.41                          |
| V82A      | 4.29 [ref. 62]  | 0.90                          | 1.76                          | 2.66                         | 0.02                         | -0.04                        | 2.64                          | -1.57                            | 0.29                             | -1.28              | 1.36                          | 0.86                          |
| V82F      | 15.00 [ref. 60] | 0.32                          | 2.39                          | 2.71                         | 0.39                         | -0.02                        | 3.07                          | 0.72                             | -0.02                            | 0.70               | 3.77                          | 1.61                          |



|           |                 |       |       |      |       |       |      |       |       |       |      |      |
|-----------|-----------------|-------|-------|------|-------|-------|------|-------|-------|-------|------|------|
| V82F/I84V | 86.00 [ref. 62] | -0.09 | 4.33  | 4.24 | 1.98  | -0.13 | 6.08 | -1.35 | 0.47  | -0.88 | 5.20 | 2.64 |
| V82I      | 17.50 [ref. 62] | 1.08  | -0.08 | 0.99 | -0.01 | -0.01 | 0.98 | 2.18  | -0.22 | 1.96  | 2.94 | 1.70 |

**Table S7.** Experimental and calculated binding free energy changes (kcal/mol) of APV in complex with the wild-type and mutant HIV-1 protease

| APV       | RL               | $\Delta\Delta E_{\text{ele}}$ | $\Delta\Delta E_{\text{vdw}}$ | $\Delta\Delta E_{\text{MM}}$ | $\Delta\Delta G_{\text{pb}}$ | $\Delta\Delta G_{\text{np}}$ | $\Delta\Delta E_{\text{cal}}$ | $-T\Delta\Delta S_{\text{conf}}$ | $-T\Delta\Delta S_{\text{solv}}$ | $-T\Delta\Delta S$ | $\Delta\Delta G_{\text{cal}}$ | $\Delta\Delta G_{\text{exp}}$ |
|-----------|------------------|-------------------------------|-------------------------------|------------------------------|------------------------------|------------------------------|-------------------------------|----------------------------------|----------------------------------|--------------------|-------------------------------|-------------------------------|
| WT        | 1.00             | 0.00                          | 0.00                          | 0.00                         | 0.00                         | 0.00                         | 0.00                          | 0.00                             | 0.00                             | 0.00               | 0.00                          | 0.00                          |
| G48V      | 4.00 [ref. 55]   | 0.85                          | -0.12                         | 0.75                         | -0.87                        | -0.03                        | -0.15                         | 1.87                             | -0.13                            | 1.74               | 1.59                          | 0.82                          |
| G48V/L90M | 11.00 [ref. 55]  | 1.12                          | -0.26                         | 0.87                         | -1.00                        | -0.03                        | -0.17                         | 1.77                             | -0.04                            | 1.73               | 1.56                          | 1.42                          |
| I47V      | 0.67 [ref. 66]   | -0.61                         | 1.12                          | 0.52                         | 0.50                         | -0.02                        | 1.00                          | -1.98                            | 0.28                             | -1.70              | -0.70                         | -0.24                         |
| I50V      | 65.00 [ref. 57]  | -3.40                         | 3.45                          | 0.07                         | 3.31                         | -0.02                        | 3.36                          | -1.70                            | 0.29                             | -1.41              | 1.95                          | 2.48                          |
| I84V      | 23.00 [ref. 70]  | -0.30                         | 2.54                          | 2.26                         | 1.44                         | -0.09                        | 3.61                          | -1.98                            | 0.01                             | -1.97              | 1.64                          | 1.86                          |
| L10F      | 0.83 [ref. 69]   | -0.12                         | -0.06                         | -0.17                        | 0.04                         | 0.00                         | -0.13                         | 0.16                             | -0.01                            | 0.15               | 0.02                          | -0.11                         |
| L10F/I50V | 60.00 [ref. 69]  | -3.44                         | 3.31                          | -0.11                        | 3.28                         | -0.03                        | 3.15                          | -1.70                            | 0.30                             | -1.40              | 1.75                          | 2.43                          |
| L10F/I84V | 20.00 [ref. 70]  | -0.23                         | 2.45                          | 2.23                         | 1.33                         | -0.08                        | 3.48                          | -1.75                            | -0.04                            | -1.79              | 1.69                          | 1.78                          |
| L90M      | 3.00 [ref. 55]   | 0.18                          | -0.07                         | 0.12                         | -0.04                        | 0.00                         | 0.07                          | -0.06                            | 0.04                             | -0.02              | 0.05                          | 0.65                          |
| M46I      | 0.50 [ref. 66]   | 0.14                          | 0.00                          | 0.16                         | -0.11                        | 0.00                         | 0.05                          | -0.09                            | -0.03                            | -0.12              | -0.07                         | -0.41                         |
| V82A      | 1.73 [ref. 62]   | 0.14                          | 1.50                          | 1.65                         | -0.03                        | -0.03                        | 1.59                          | -1.64                            | 0.45                             | -1.19              | 0.40                          | 0.33                          |
| V82F      | 0.35 [ref. 62]   | 0.33                          | 0.62                          | 0.96                         | 0.21                         | -0.01                        | 1.16                          | 1.53                             | -0.19                            | 1.34               | 2.50                          | -0.62                         |
| V82F/I84V | 100.00 [ref. 62] | 0.23                          | 3.01                          | 3.25                         | 1.57                         | -0.07                        | 4.74                          | -0.24                            | -0.10                            | -0.34              | 4.40                          | 2.73                          |
| V82I      | 3.30 [ref. 62]   | 0.21                          | -0.05                         | 0.17                         | 0.00                         | 0.01                         | 0.18                          | 1.93                             | -0.06                            | 1.87               | 2.05                          | 0.71                          |

**Table S8.** Experimental and calculated binding free energy changes (kcal/mol) of LPV in complex with the wild-type and mutant HIV-1 protease

| LPV       | RL             | $\Delta\Delta E_{\text{ele}}$ | $\Delta\Delta E_{\text{vdw}}$ | $\Delta\Delta E_{\text{MM}}$ | $\Delta\Delta G_{\text{pb}}$ | $\Delta\Delta G_{\text{np}}$ | $\Delta\Delta E_{\text{cal}}$ | $-T\Delta\Delta S_{\text{conf}}$ | $-T\Delta\Delta S_{\text{solv}}$ | $-T\Delta\Delta S$ | $\Delta\Delta G_{\text{cal}}$ | $\Delta\Delta G_{\text{exp}}$ |
|-----------|----------------|-------------------------------|-------------------------------|------------------------------|------------------------------|------------------------------|-------------------------------|----------------------------------|----------------------------------|--------------------|-------------------------------|-------------------------------|
| WT        | 1.00           | 0.00                          | 0.00                          | 0.00                         | 0.00                         | 0.00                         | 0.00                          | 0.00                             | 0.00                             | 0.00               | 0.00                          | 0.00                          |
| L10I/L90M | 1.40 [ref. 65] | -0.05                         | 0.02                          | -0.03                        | -0.09                        | 0.01                         | -0.12                         | -0.12                            | 0.05                             | -0.07              | -0.19                         | 0.20                          |
| M46I/I54V | 1.50 [ref. 65] | 0.18                          | 0.07                          | 0.25                         | -0.02                        | 0.00                         | 0.23                          | -0.09                            | -0.06                            | -0.15              | 0.08                          | 0.24                          |
| V82A      | 3.77 [ref. 58] | -0.13                         | 1.15                          | 1.03                         | 0.12                         | -0.03                        | 1.12                          | -0.78                            | 0.43                             | -0.35              | 0.77                          | 0.79                          |
| V82A/I84V | 7.60 [ref. 65] | -0.27                         | 3.46                          | 3.19                         | 1.16                         | -0.09                        | 4.26                          | -2.74                            | 1.50                             | -1.24              | 3.02                          | 1.20                          |

|      |                |       |      |      |      |       |      |       |      |      |      |      |
|------|----------------|-------|------|------|------|-------|------|-------|------|------|------|------|
| V82F | 2.85 [ref. 58] | -0.03 | 1.17 | 1.14 | 0.55 | -0.04 | 1.65 | 0.20  | 0.01 | 0.21 | 1.86 | 0.62 |
| V82T | 2.77 [ref. 58] | -0.06 | 0.46 | 0.40 | 0.92 | -0.01 | 1.30 | -0.04 | 0.15 | 0.11 | 1.41 | 0.60 |

**Table S9.** Comparison of the CMS with MD results calculated for the mutations that induce binding mode changes.

|     |     |      | RL        | $\Delta E_{\text{ele}}$ | $\Delta E_{\text{vdW}}$ | $\Delta E_{\text{MM}}$ | $\Delta G_{\text{PB}}$ | $\Delta G_{\text{np}}$ | $\Delta E_{\text{bind}}$ | $-\Delta S_{\text{conf}}$ | $-\Delta S_{\text{solv}}$ | $-\Delta S$ | $\Delta G_{\text{bind}}$ | $\Delta\Delta G_{\text{bind}}$ |
|-----|-----|------|-----------|-------------------------|-------------------------|------------------------|------------------------|------------------------|--------------------------|---------------------------|---------------------------|-------------|--------------------------|--------------------------------|
| IDV | CMS | R8Q  | 8.20      | -80.09                  | -72.92                  | -153.01                | 99.92                  | -6.76                  | -59.85                   | 61.58                     | -24.07                    | 37.51       | -22.34                   | 3.92                           |
|     | MD  |      | [ref. 69] | -69.58                  | -71.17                  | -140.75                | 82.74                  | -6.72                  | -64.73                   | 61.80                     | -23.42                    | 38.38       | -26.35                   | -0.09                          |
| APV | CMS | V82F | 0.35      | -73.96                  | -62.23                  | -136.19                | 86.21                  | -5.69                  | -55.67                   | 56.39                     | -20.77                    | 35.62       | -20.05                   | 2.50                           |
|     | MD  |      | [ref. 62] | -62.14                  | -61.14                  | -123.29                | 73.97                  | -5.40                  | -54.72                   | 51.11                     | -19.17                    | 31.94       | -22.78                   | -0.23                          |

**Table S10.** Comparison between the overall X-ray crystal structures of wild-type HIV-1 protease and its mutants. All of the crystal structures have a ligand (SQV) bound in the binding pocket, unless indicated otherwise (N.A.: Not Applicable, with an inhibitor other than SQV).

| Mutation type of HIV-1 protease (pdb entry)                            | RMSD of backbone | RMSD of ligand |
|------------------------------------------------------------------------|------------------|----------------|
|                                                                        | atoms            | atoms          |
| G48V (3CYW)                                                            | 0.60             | N.A.           |
| I50V (3CYX)                                                            | 0.55             | 0.21           |
| I54M (3D1X)                                                            | 0.47             | 0.10           |
| V82A (2NMY)                                                            | 0.59             | 0.17           |
| I84V (2NNK)                                                            | 0.64             | 0.19           |
| A71T/V82A (1ODX)                                                       | 0.43             | N.A.           |
| Q7K/I64V/T80N (2FGV)                                                   | 0.55             | 0.55           |
| Q7K/I64V/T80S (2FGU)                                                   | 0.53             | 0.57           |
| Q7K/D25N/L63P/V82A (1MTB)                                              | 0.37             | 0.62           |
| T31S/V32I/L33V/E34A/E35G/<br>M36I/S37E/I47V/V82I (1BDQ)                | 0.69             | N.A.           |
| L10F/I13V/G16A/K20M/V32I/K43T/M46V/<br>I47V/I54M/I64V/A71V/V82A (2RKF) | 0.48             | N.A.           |
